# Supplementary material
Source: Springer Nature journal article supplement (https://www.springermedizin.de/resource/supplementary/12874_2012_862_MOESM6_ESM.pdf/9433154)

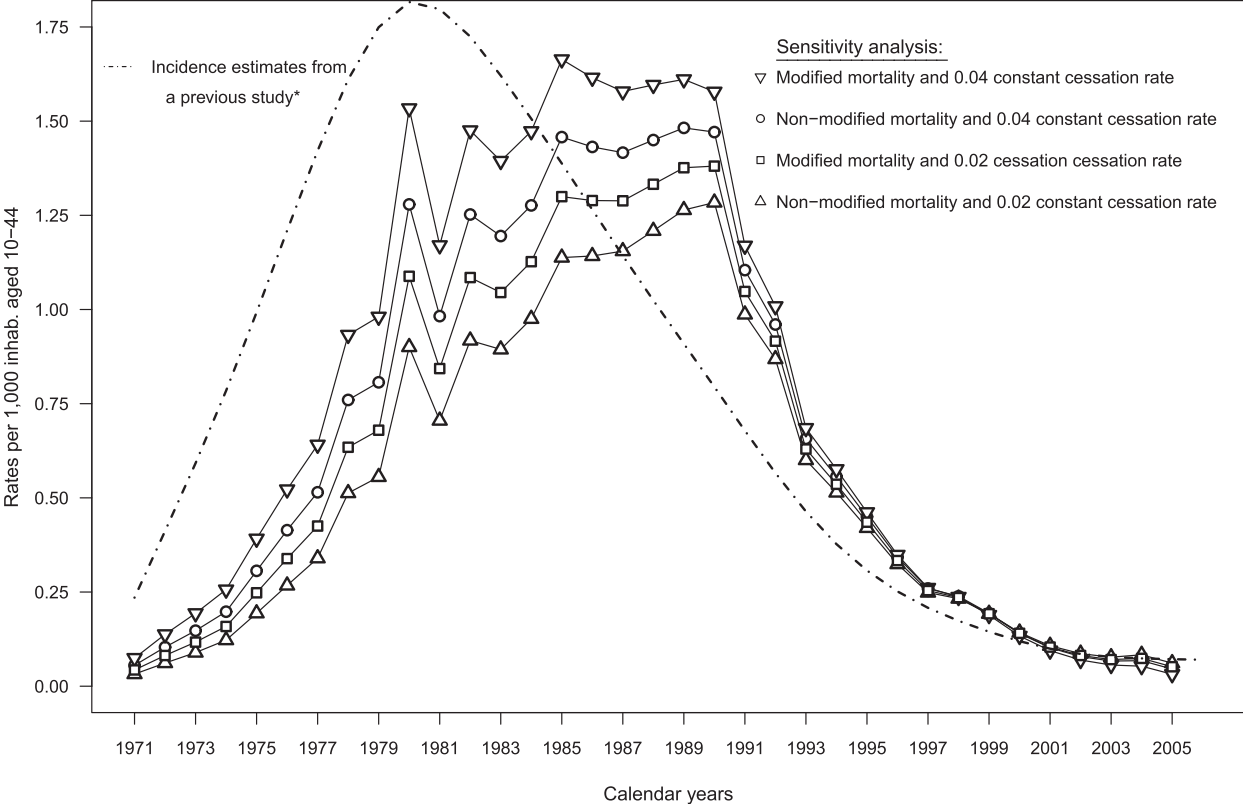

\* Sanchez-Niubo A et al. Problematic heroin use incidence trends in Spain. *Addiction* 2009; 104: 248-255.

Supplement: MOESM6 [file 9433154]
